# Supplementary material
Source: publisher figshare collection journal article supplement (https://sage.figshare.com/ndownloader/files/14241221)
Supplement: Supplementary file 1 [file 14241221]

## Sheet: Sheet1
Fontana Manca not in diagram
Species	zone 1	zone 2	zone 3	zone 4	zone 5	zone 6	zone 7	zone 8
Upland forest
Acer							•
Betula		•		•		•
Carpinus betulus		•	•	•	•	•	•	•
Corylus	•	•			•	•	•
Fraxinus excelsior-type		•			•	•
Hedera	•	•	•	•	•	•	•	•
Loranthus europaeus		•	•	•		•	•
Malus	•	•		•
Platanus	•
Populus		•
Tilia	•	•					•	•
Ulmus	•			•	•	•	•	•
Viscum					•
Vitis	•	•		•		•		•
Upland secondary woodland
Clematis			•
Crataegus		•			•
Ericaceae		•	•	•	•	•	•
Euonymus				•
Ilex		•
Jasminum						•
Juniperus		•
Viburnum								•
Upland herbs
Artemisia	•	•			•	•	•	•
Asparagus-type				•
Asteraceae liguliflorae	•			•	•	•	•	•
Asteraceae tubuliflorae					•	•	•	•
Beta	•					•	•
Campanula						•
Caryophyllaceae				•		•		•
Centaurea jacea-type						•
Centaurea solstitialis						•	•	•
Cerastium-type							•
Chenopodiaceae		•		•	•	•	•	•
Cirsium		•			•	•
Coronilla		•
Echium		•
Ephedra distachia-type						•	•
Ephedra fragilis-type		•					•
Hypericum			•
Matricaria		•		•	•	•		•
Paronychia				•				•
Plantago coronopus-type					•			•
Plantago lanceolata-type	•	•	•	•	•	•	•	•
Plantago major-media-type		•
Pleurospermum		•
Polygonum aviculare						•	•	•
Potentilla		•						•
Ranunculus acris-type	•					•	•
Rumex acetosa-type				•	•	•		•
Scabiosa		•
Senecio					•
Solanum nigrum								•
Spergularia						•
Urtica urens				•
Verbascum/Scrophularia-type								•
Verbena					•
Ophioglossum						•
Polypodium	•						•
Pteridium	•			•	•	•	•	•
Wetland and aquatic vegetation
Batrachium						•
Humulus					•
Scirpus type				•
Dryopteris	•	•			•	•	•	•
Sphagnum	•
Assulina			•
Botryococcus	•	•	•	•	•	•	•	•
Gloeotrichia	•	•	•	•	•	•	•	•
Ecologically indeterminate
Apiaceae	•	•	•	•	•	•	•	•
Brassicaceae	•	•	•	•	•	•	•	•
Convolvulus					•
Euphrasia/Veronica		•
Fabaceae				•	•	•
Galium				•		•	•
Mentha-type				•
Polygonum bistorta-type				•
Ranunculus type			•		•	•	•	•
Rosaceae		•			•
Rumex aquaticus-type							•	•
Urtica	•		•	•
Gelasinospora	•
Glomus				•		•	•	•
Hystrix			•	•
Neurospora	•
Thecaphora						•	•	•
Type 30				•
Type 41				•
Type 55	•							•
Type 111								•
Type 353A				•
Type 361	•		•	•		•	•	•
Type 480	•					•	•
